# Supplementary material
Source: PubMed Central journal article supplement (PMC6302068)
Supplement: mmc1.pdf [file mmc1.pdf]

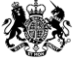

Medicines & Healthcare products  
Regulatory Agency

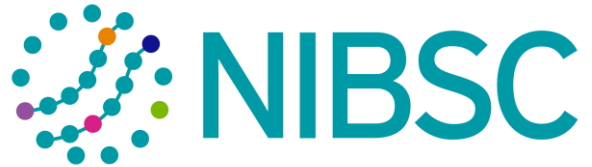

Caroline Blackwell,  
Managing Secretary,  
Editorial Office,  
Reproductive Biomedicine Online,  
Elsevier Inc.,

**National Institute for Biological  
Standards and Control**

Blanche Lane  
South Mimms  
Potters Bar  
Hertfordshire EN6 3QG

**[www.nibsc.org](http://www.nibsc.org)**

15 March 2018

Dear Ms Blackwell,

RBMO-D-17-00704: Towards International Standardization of Immunoassays for Mullerian Inhibiting Substance/Anti-Mullerian Hormone

I confirm that I am in agreement with the addition of Dr Paul Matejtschuk and Chinwe Duru as authors to the above manuscript for the reasons outlined by Dr Jackie Ferguson in her letter dated 15 March 2018.

Yours sincerely,

Chris Burns, PhD  
Head, Biotherapeutics Division

T 01707 641000  
E [Chris.Burns@nibsc.org](mailto:Chris.Burns@nibsc.org)
