# Supplementary material
Source: PubMed Central journal article supplement (PMC6302068)
Supplement: mmc2.pdf [file mmc2.pdf]

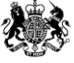

Medicines & Healthcare products  
Regulatory Agency

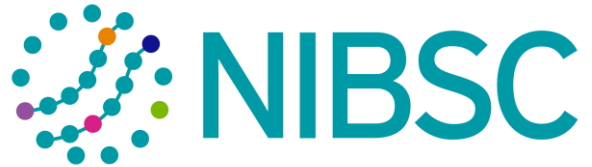

Caroline Blackwell,  
Managing Secretary,  
Editorial Office,  
Reproductive Biomedicine Online,  
Elsevier Inc.,

**National Institute for Biological  
Standards and Control**

Blanche Lane  
South Mimms  
Potters Bar  
Hertfordshire EN6 3QG

**[www.nibsc.org](http://www.nibsc.org)**

15 March 2018

Dear Ms Blackwell,

RBMO-D-17-00704: Towards International Standardization of Immunoassays for Mullerian Inhibiting Substance/Anti-Mullerian Hormone

I confirm that I agree to be added as a co-author of the above manuscript for the contribution described by Dr Jackie Ferguson in her letter dated 15 March 2018.

Yours sincerely,

Chinwe Duru, M.Sc  
Scientist

T 01707 641000  
E [Chinwe.Duru@nibsc.org](mailto:Chinwe.Duru@nibsc.org)
