# Supplementary material
Source: PubMed Central journal article supplement (PMC6302068)
Supplement: mmc4.pdf [file mmc4.pdf]

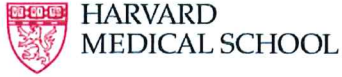

HARVARD  
MEDICAL SCHOOL

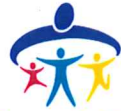

MassGeneral Hospital  
for Children

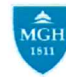

MASSACHUSETTS  
GENERAL HOSPITAL

---

The Simches Research Center  
Charles River Plaza North  
185 Cambridge Street, 6.206  
Boston, MA 02114  
Tel: 617.724.1600 / Fax: 617.726.5057

Patricia K. Donahoe, M.D.  
Director of Pediatric Surgical Research  
Marshall K. Bartlett Professor of Surgery

E-mail: [pdonahoe@partners.org](mailto:pdonahoe@partners.org)

Dear Ms Blackwell,

RBMO-D-17-00704: Towards International Standardization of Immunoassays for Mullerian Inhibiting Substance/Anti-Mullerian Hormone

I confirm that I am in agreement with the addition of Dr Paul Matejtschuk and Chinwe Duru as co-authors to the above manuscript for the contribution outlined by Dr Jackie Ferguson in her letter dated 15 March 2018.

Yours sincerely,

Patricia K. Donahoe

David Pepin
