# Supplementary material
Source: PubMed Central journal article supplement (PMC6302068)
Supplement: mmc5.pdf [file mmc5.pdf]

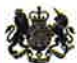

Medicines & Healthcare products  
Regulatory Agency

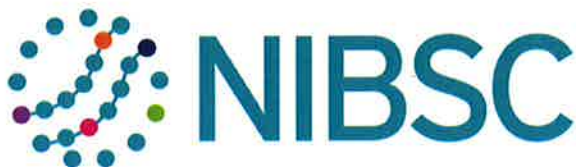

Caroline Blackwell,  
Managing Secretary,  
Editorial Office,  
Reproductive Biomedicine Online,  
Elsevier Inc.,

**National Institute for Biological  
Standards and Control**

Blanche Lane  
South Mimms  
Potters Bar  
Hertfordshire EN6 3QG

[www.nibsc.org](http://www.nibsc.org)

15 March 2018

Dear Ms Blackwell,

RBMO-D-17-00704: Towards International Standardization of Immunoassays for Mullerian Inhibiting Substance/Anti-Mullerian Hormone

I confirm that I agree to be added as a co-author of the above manuscript for the contribution described by Dr Jackie Ferguson in her letter dated 15 March 2018.

Yours sincerely,

Paul Matejtschuk, PhD, CChem  
Principal Scientist & Section Head, Standardisation Science, TDI,

T 01707 641515

E [Paul.Matejtschuk@nibsc.org](mailto:Paul.Matejtschuk@nibsc.org)
